# Supplementary material
Source: PubMed Central journal article supplement (PMC8449007)
Supplement: mmc1.pdf [file mmc1.pdf]

# Association of Triglyceride-Glucose Index and Lung Health

## A Population-Based Study

*Tianshi David Wu, MD, MHS; Ashraf Fawzy, MD, MPH; Emily Brigham, MD, MHS; Meredith C. McCormack, MD, MHS; Ivan Rosas, MD; Dennis T. Villareal, MD; and Nicola A. Hanania, MD*

CHEST 2021; 160(3):1026-1034

*Online supplements are not copyedited prior to posting and the author(s) take full responsibility for the accuracy of all data.*

© 2021 AMERICAN COLLEGE OF CHEST PHYSICIANS. Reproduction of this article is prohibited without written permission from the American College of Chest Physicians. See online for more details. DOI: 10.1016/j.chest.2021.03.056

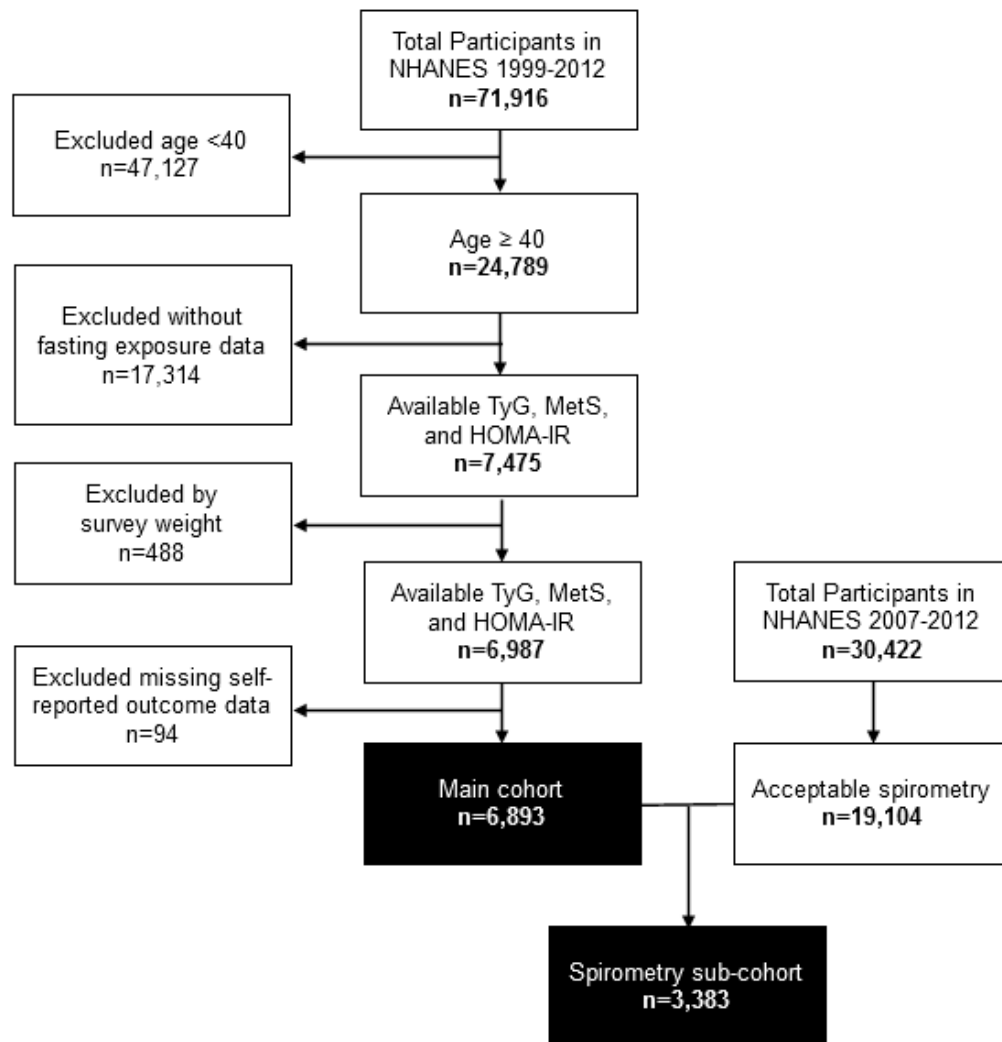

**e-Figure 1.** Flowchart of cohort derivation. TyG: triglyceride-glucose index; HOMA-IR: homeostatic model assessment of insulin resistance

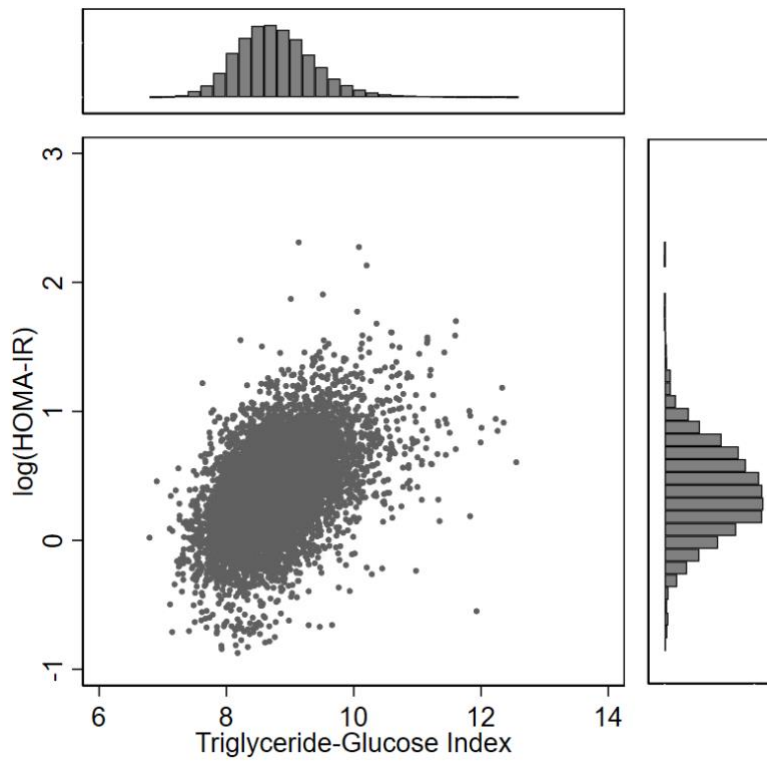

**e-Figure 2.** Scatterplot of triglyceride-glucose index against log-transformed homeostatic model assessment of insulin resistance (HOMA-IR). Marginal histograms for each analyte are also displayed. The population-weighted Spearman's rho was 0.51.

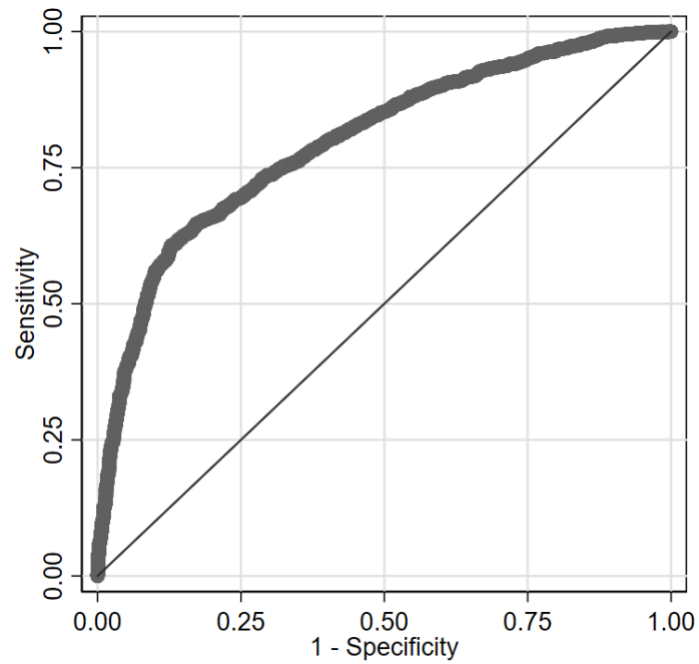

**e-Figure 3.** Population-weighted receiver operating characteristic curve of triglyceride-glucose index for detection of metabolic syndrome. Area under the curve (95% confidence interval) is 0.80 (0.78, 0.81).

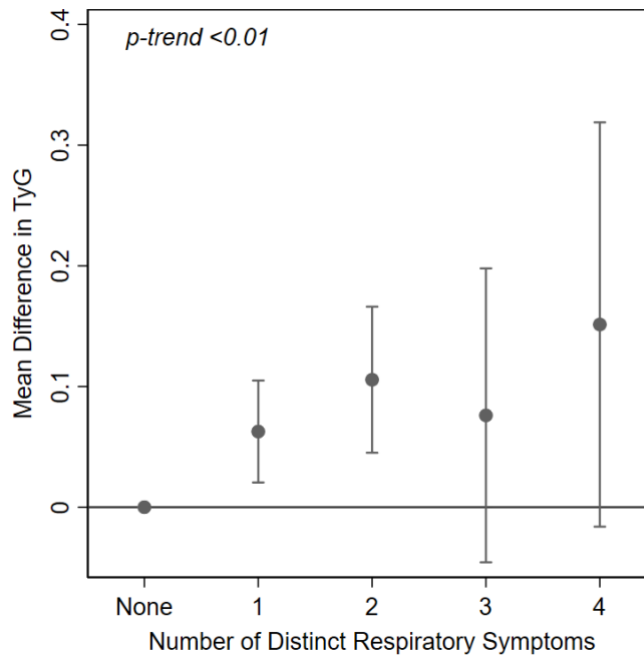

**e-Figure 4.** Association of triglyceride-glucose index (TyG) with number of distinct respiratory symptoms. Shown are mean difference in TyG compared to the referent group of no symptoms, adjusted for age, gender, race-ethnicity, body mass index, poverty-income ratio, cardiovascular disease, smoking status, smoking years, and fasting time. The p-value indicates a test for linear trend with increasing number of symptoms derived by treating symptom count as a continuous variable.

**e-Table 1.** Association of triglyceride-glucose index (TyG) with study outcomes, stratified by gender\*

| <b>Symptom, aOR (95% CI)</b>             | Gender               |                      | p-value+ |
|------------------------------------------|----------------------|----------------------|----------|
|                                          | Male                 | Female               |          |
| Cough                                    | 1.17 (0.93, 1.47)    | 1.38 (1.09, 1.75)    | 0.24     |
| Phlegm production                        | 1.10 (0.89, 1.37)    | 1.32 (1.05, 1.66)    | 0.22     |
| Wheeze                                   | 1.21 (1.03, 1.43)    | 1.15 (0.92, 1.43)    | 0.69     |
| Exertional dyspnea                       | 1.18 (1.02, 1.37)    | 1.24 (1.04, 1.48)    | 0.64     |
| <b>Condition, aOR (95% CI)</b>           |                      |                      |          |
| Asthma                                   | 0.91 (0.71, 1.16)    | 1.26 (1.01, 1.57)    | 0.06     |
| Chronic bronchitis                       | 1.25 (0.93, 1.68)    | 1.19 (0.95, 1.48)    | 0.78     |
| Emphysema                                | 0.89 (0.64, 1.24)    | 1.16 (0.56, 2.38)    | 0.54     |
| <b>Spirometry, aMD (95% CI)</b>          |                      |                      |          |
| Percent-predicted FEV1                   | -2.08 (-3.84, -0.32) | -0.92 (-2.73, 0.89)  | 0.35     |
| Percent-predicted FVC                    | -2.44 (-4.01, -0.88) | -1.98 (-3.59, -0.36) | 0.66     |
| FEV1/FVC                                 | 0.09 (-0.66, 0.84)   | 0.94 (0.32, 1.56)    | 0.06     |
| <b>Spirometry Pattern, aRRR (95% CI)</b> |                      |                      |          |
| Obstructive                              | 0.91 (0.69, 1.2)     | 0.87 (0.68, 1.12)    | 0.97     |
| Restrictive                              | 1.48 (0.97, 2.27)    | 1.45 (0.98, 2.14)    |          |

\* adjusted for age, race-ethnicity, body mass index, poverty-income ratio, cardiovascular disease, smoking status, smoking years, and fasting time; + p-value for interaction of TyG by gender; aOR: adjusted odds ratio; aMD: adjusted mean difference; aRRR: adjusted relative risk ratio; CI: confidence interval; FEV1: forced exhaled volume in 1 second; FVC: forced vital capacity

**e-Table 2.** Association of triglyceride-glucose index (TyG) with study outcomes, stratified by race-ethnicity\*

| <b>Symptom, aOR (95% CI)</b>             | Race-Ethnicity       |                      |                     | p-value+ |
|------------------------------------------|----------------------|----------------------|---------------------|----------|
|                                          | Hispanic             | White                | Black               |          |
| Cough                                    | 0.72 (0.5, 1.03)     | 1.36 (1.09, 1.71)    | 1.56 (1.17, 2.09)   | <0.01    |
| Phlegm production                        | 0.84 (0.59, 1.2)     | 1.27 (1.01, 1.59)    | 1.02 (0.76, 1.36)   | 0.13     |
| Wheeze                                   | 1.05 (0.72, 1.53)    | 1.22 (1.03, 1.44)    | 1.23 (0.97, 1.56)   | 0.75     |
| Exertional dyspnea                       | 1.05 (0.87, 1.27)    | 1.28 (1.09, 1.52)    | 1.04 (0.87, 1.24)   | 0.18     |
| <b>Condition, aOR (95% CI)</b>           |                      |                      |                     |          |
| Asthma                                   | 0.95 (0.64, 1.42)    | 1.19 (0.97, 1.45)    | 0.9 (0.69, 1.18)    | 0.25     |
| Chronic bronchitis                       | 0.92 (0.58, 1.45)    | 1.34 (1.11, 1.62)    | 0.97 (0.67, 1.41)   | 0.15     |
| Emphysema                                | 0.58 (0.27, 1.28)    | 1.08 (0.71, 1.63)    | 0.71 (0.23, 2.16)   | 0.39     |
| <b>Spirometry, aMD (95% CI)</b>          |                      |                      |                     |          |
| Percent-predicted FEV1                   | -2.11 (-4.3, 0.09)   | -1.66 (-3.3, -0.02)  | 0.01 (-2.17, 2.18)  | 0.33     |
| Percent-predicted FVC                    | -2.99 (-4.89, -1.09) | -2.19 (-3.81, -0.58) | -0.51 (-2.15, 1.14) | 0.13     |
| FEV1/FVC                                 | 0.65 (0.08, 1.22)    | 0.33 (-0.27, 0.93)   | 0.57 (-0.56, 1.7)   | 0.66     |
| <b>Spirometry Pattern, aRRR (95% CI)</b> |                      |                      |                     |          |
| Obstructive                              | 0.91 (0.59, 1.42)    | 0.91 (0.72, 1.14)    | 0.7 (0.49, 1)       | 0.04     |
| Restrictive                              | 1.29 (0.86, 1.94)    | 1.5 (1.06, 2.11)     | 0.72 (0.46, 1.12)   |          |

\* adjusted for age, gender, body mass index, poverty-income ratio, cardiovascular disease, smoking status, smoking years, and fasting time; + p-value for interaction of TyG by race-ethnicity; aOR: adjusted odds ratio; aMD: adjusted mean difference; aRRR: adjusted relative risk ratio; CI: confidence interval; FEV1: forced exhaled volume in 1 second; FVC: forced vital capacity

**e-Table 3.** Association of triglyceride-glucose index (TyG), the homeostatic model assessment of insulin resistance (HOMA-IR), and the presence of metabolic syndrome with study outcomes\*

| Symptom, aOR (95% CI)                    | Metabolic parameter         |                             |                             |
|------------------------------------------|-----------------------------|-----------------------------|-----------------------------|
|                                          | TyG+                        | log(HOMA-IR)                | Metabolic syndrome          |
| Cough                                    | <b>1.28 (1.06, 1.54)</b>    | <b>1.40 (1.01, 1.94)</b>    | <b>1.34 (1.03, 1.76)</b>    |
| Phlegm production                        | <b>1.20 (1.01, 1.43)</b>    | 1.20 (0.81, 1.79)           | 1.19 (0.95, 1.49)           |
| Wheeze                                   | <b>1.18 (1.03, 1.35)</b>    | 1.02 (0.77, 1.35)           | <b>1.25 (1.04, 1.51)</b>    |
| Exertional dyspnea                       | <b>1.21 (1.07, 1.38)</b>    | <b>1.36 (1.08, 1.70)</b>    | <b>1.31 (1.11, 1.55)</b>    |
| <b>Condition, aOR (95% CI)</b>           |                             |                             |                             |
| Asthma                                   | 1.09 (0.93, 1.29)           | 1.06 (0.78, 1.43)           | 1.19 (0.95, 1.48)           |
| Chronic bronchitis                       | <b>1.21 (1.02, 1.43)</b>    | 1.28 (0.84, 1.95)           | 1.17 (0.89, 1.55)           |
| Emphysema                                | 1.01 (0.69, 1.49)           | 1.08 (0.60, 1.95)           | 1.12 (0.75, 1.68)           |
| <b>Spirometry, aMD (95% CI)</b>          |                             |                             |                             |
| Percent-predicted FEV1                   | <b>-1.53 (-2.80, -0.26)</b> | <b>-4.42 (-7.51, -1.32)</b> | <b>-3.18 (-4.92, -1.45)</b> |
| Percent-predicted FVC                    | <b>-2.22 (-3.41, -1.03)</b> | <b>-5.88 (-8.52, -3.23)</b> | <b>-3.00 (-4.23, -1.77)</b> |
| FEV1/FVC                                 | 0.50 (-0.04, 1.03)          | 1.15 (-0.15, 2.44)          | -0.24 (-1.18, 0.70)         |
| <b>Spirometry Pattern, aRRR (95% CI)</b> |                             |                             |                             |
| Obstructive                              | 0.88 (0.72, 1.06)           | 0.91 (0.56, 1.47)           | 1.09 (0.79, 1.50)           |
| Restrictive                              | <b>1.45 (1.11, 1.90)</b>    | 1.79 (0.90, 3.59)           | 1.66 (0.99, 2.77)           |

\* adjusted for age, gender, race-ethnicity, body mass index, poverty-income ratio, cardiovascular disease, smoking status, smoking years, and fasting time; + identical to Figure 1 and included to aid comparison; aOR: adjusted odds ratio; aMD: adjusted mean difference; aRRR: adjusted relative risk ratio; CI: confidence interval; FEV1: forced exhaled volume in 1 second; FVC: forced vital capacity
